## Correction: Preoperative chemoradiotherapy for rectal cancer: the sensitizer role of the association between miR-375 and c-Myc

Raquel Conde-Muiño<sup>1,\*</sup>, Carlos Cano<sup>2,\*</sup>, Victoria Sánchez-Martín<sup>3,4</sup>, Antonio Herrera-Merchan<sup>4,5</sup>, Ana Comino<sup>1</sup>, Pedro P. Medina<sup>4,5</sup>, Pablo Palma<sup>1,\*</sup> and Marta Cuadros<sup>3,4,\*</sup>

<sup>1</sup>Division of Colon & Rectal Surgery, University Hospital Virgen de las Nieves, Granada, Spain

<sup>2</sup>Department of Computer Science and Artificial Intelligence, University of Granada, Granada, Spain

<sup>3</sup>Department of Biochemistry, Molecular Biology III and Immunology, University of Granada, Granada, Spain

<sup>4</sup>GENYO, Centre for Genomics and Oncological Research, Pfizer/University of Granada/Junta de Andalucía, PTS Granada, Granada, Spain

<sup>5</sup>Department of Biochemistry and Molecular Biology I, University of Granada, Granada, Spain

\*These authors have contributed equally to this work

**Published:** March 31, 2020

**Copyright:** Conde-Muiño et al. This is an open-access article distributed under the terms of the Creative Commons Attribution License 3.0 (CC BY 3.0), which permits unrestricted use, distribution, and reproduction in any medium, provided the original author and source are credited.

**This article has been corrected:** The name of the 4th author in the listing has been updated, correcting the name as follows:

**Antonio Herrera-Merchan<sup>4,5</sup>**

Original article: Oncotarget. 2017; 8:82294–82302. <https://doi.org/10.18632/oncotarget.19393>
